# Supplementary material for: Crystal-seeds induced construction of ZnO–ZnFe2O4 micro-cubic composites as excellent anode materials for lithium ion battery
Source: Royal Society of Chemistry journal article supplement (doi:10.1039/c8ra01785a), 2018-01-01
Supplement: c8ra01785a1.pdf [file c8ra01785a1.pdf]

## Electronic supplementary information (ESI)

### Crystal-seeds induced construction of ZnO-ZnFe<sub>2</sub>O<sub>4</sub> micro-cubic composites as excellent anode materials for lithium ion battery

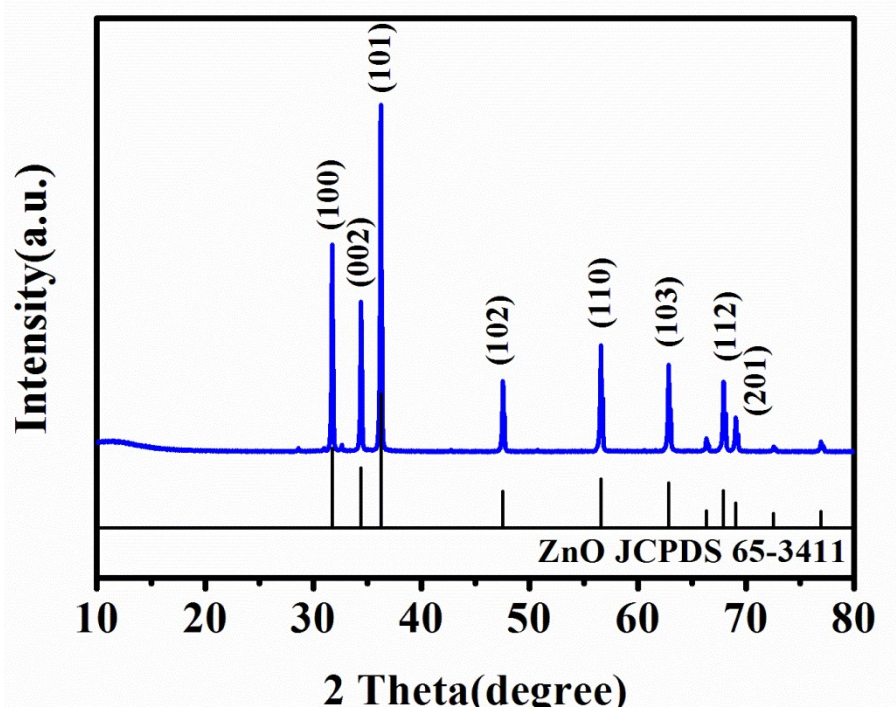

Fig. S1 XRD pattern of the ZnO seed

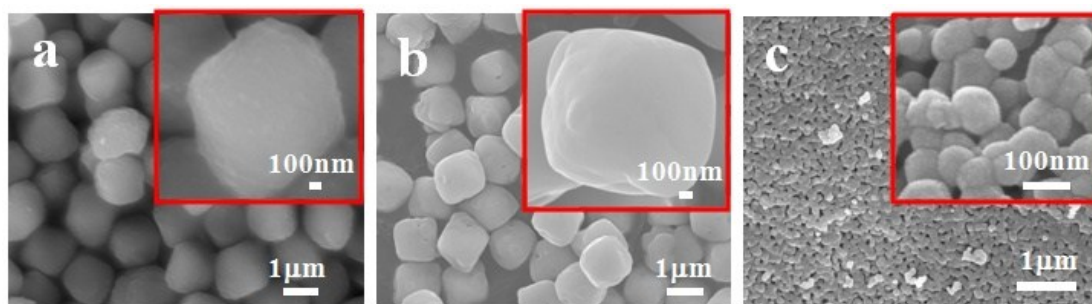

Fig. S2 SEM images of the ZnO seed(a), ZnFe-3-raw(b) and ZnFe-1(c)

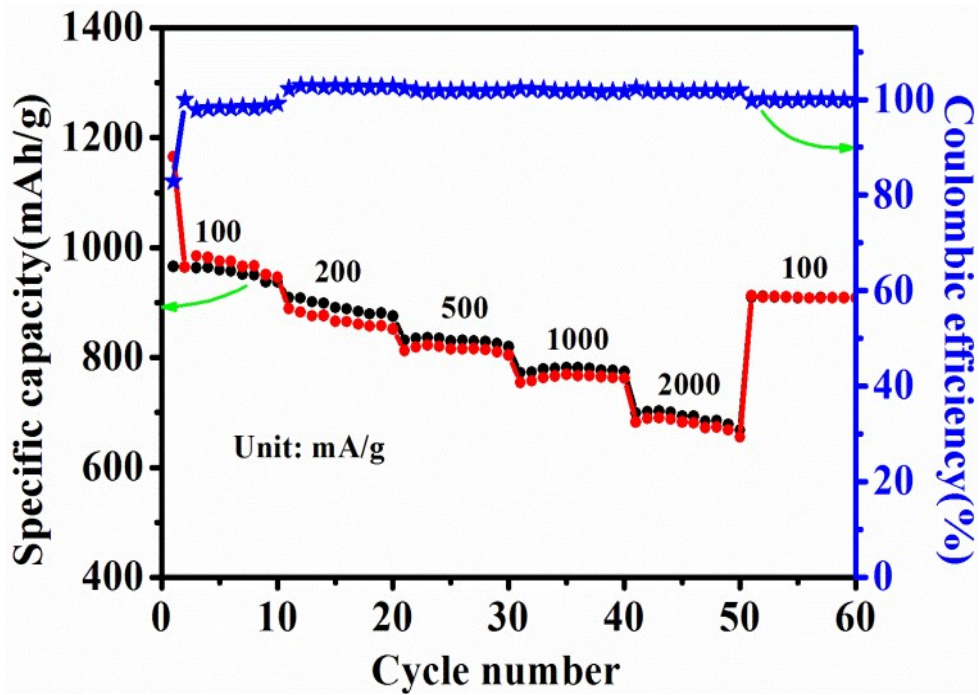

Fig. S3 The rate performance ZnFe-3 electrode

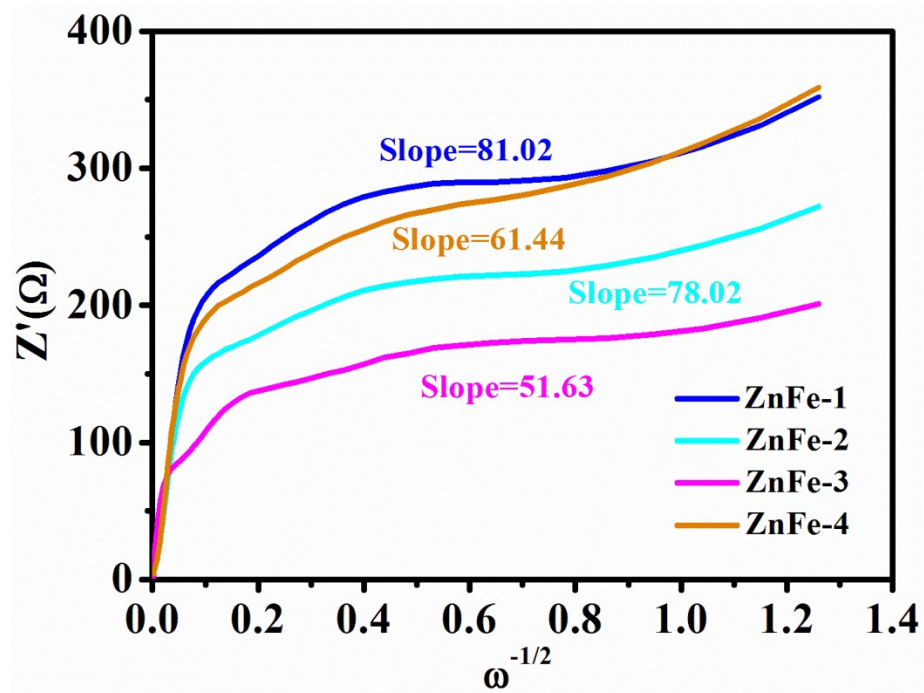

Fig. S4 The linear fitting of Warburg impedance of the ZnO-ZnFe<sub>2</sub>O<sub>4</sub>

**Table S1 Electrochemical performances of ZnO or ZnFe<sub>2</sub>O<sub>4</sub> materials previously reported for lithium-ion batteries**

| Materials                                                                  | Current density<br>(A·g <sup>-1</sup> ) | Cycle<br>number | Capacity<br>(mAh·g <sup>-1</sup> ) | Reference                                  |
|----------------------------------------------------------------------------|-----------------------------------------|-----------------|------------------------------------|--------------------------------------------|
| ZnFe <sub>2</sub> O <sub>4</sub> nanoparticles                             | 0.116                                   | 50              | over 800                           | Electrochim. Acta,<br>2011, 56: 9433–9438. |
| ZnFe <sub>2</sub> O <sub>4</sub> Nano-<br>Octahedrons                      | 0.06                                    | 80              | 910                                | Nano. Res., 2012, 5:<br>477-485.           |
| ZnFe <sub>2</sub> O <sub>4</sub> /C microspheres                           | 0.05                                    | 100             | 1100                               | J. Power Sources<br>2014, 258: 305-313     |
| nitrogen-doped carbon<br>coated ZnFe <sub>2</sub> O <sub>4</sub> composite | 0.1                                     | 100             | 1477                               | Electrochim. Acta,<br>2015, 180: 622–628   |
| ZnFe <sub>2</sub> O <sub>4</sub> nanorods                                  | 0.1                                     | 50              | 983                                | J. Power Sources,<br>2016, 306: 718-723    |
| ZnO/ZnFe <sub>2</sub> O <sub>4</sub> porous<br>nanoparticles               | 1                                       | 500             | 804                                | Chem. Eng. J., 2017,<br>308: 340–346       |
| ZnO-ZnFe <sub>2</sub> O <sub>4</sub><br>hollow microspheres                | 0.1                                     | 300             | 625                                | Electrochim. Acta,<br>2017, 249: 79–88     |
| ZnFe <sub>2</sub> O <sub>4</sub> nanoparticles<br>/rGO composite           | 0.2                                     | 400             | 1106.7                             | J. Alloy. Compd.,<br>2018, 737: 58-66      |
| carbon-coated ZnFe <sub>2</sub> O <sub>4</sub><br>nanoflakes               | 0.5                                     | 1000            | 778.6                              | Dalton Trans., 2018, 47:<br>3521-3529      |
| <b>ZnO-ZnFe<sub>2</sub>O<sub>4</sub> micro-<br/>cubic particles</b>        | <b>0.1</b>                              | <b>200</b>      | <b>811</b>                         | <b>In this work</b>                        |
